# Supplementary material
Source: PubMed Central journal article supplement (PMC3021012)
Supplement: 1015493108_pnas.201015493SI.pdf [file 1015493108_pnas.201015493SI.pdf]

# Supporting Information

Gray et al. 10.1073/pnas.1015493108

## SI Text

### Mind Survey

Participants were asked to make judgments about the perceived mental capacities of nine targets, each of which was accompanied by a picture and brief description. Participants indicated the extent to which they perceived each target to be capable of six capacities on a scale from 0 (not at all) to 6 (very much).

**Mind Perception Targets.** Adult Human Female. *Sharon Harvey*. Sharon Harvey, 38, works at an advertising agency in Chicago.

Adult Human Male. *Todd Billingsly*. Todd Billingsly is a 30-year-old accountant who lives in New York City.

Deceased Human. *Dolores Gleitman*. Dolores Gleitman recently passed away at the age of 65.

Dog. *Charlie*. Charlie is a 3-year-old Springer spaniel and a beloved member of the Graham family.

God. *God*. Many believe that God is the creator of the universe and the ultimate source of knowledge, power, and love. However, please draw upon your own personal beliefs about God.

Human Infant. *Nicholas*. Nicholas is a 5-month-old baby.

Robot. *Kismet*. Kismet is part of a new class of sociable robots that can engage people in natural interaction.

Superman. *Superman*. A comic book superhero born on the planet Krypton.

Tree. *Tree*. A leafy oak tree.

**Mind Perception Questions.** How capable of **feeling fear** do you think X is?

How capable of **exercising self-control** do you think X is?

How capable of **feeling pleasure** do you think X is?

How capable of **remembering** do you think X is?

How capable of **feeling hunger** do you think X is?

How capable of **acting morally** do you think X is?

**Participant Exclusion Criteria.** Although 890 participants were recruited, some were excluded from analysis. In particular, participants were excluded for leaving an incomplete survey, for answering the same response for all questions, or for strongly endorsing all three embedded catch statements (“I believe I can fly.” “I have never been disliked.” “I have had my nose broken many times.”). These questions, although plausibly related to psychopathology, do not form part of any psychopathology scale. Although any may be truthfully endorsed singly, we surmised that anyone would be unlikely to truthfully endorse all of them. After exclusions, there were 845 participants remaining.

**Confirmatory Factor Analysis.** Based on previous research (1), we expected that the perceived capacity for fear, pleasure, and hunger would load onto one factor (experience) and the perceived capacity for self-control, memory, and acting morally would load onto another factor (agency). To test this factor structure, the data were collapsed across subjects and subjected to a confirmatory factor analysis. This analysis revealed that this two-factor structure provided a statistically significant fit,  $\chi^2 = 546.53$ ,  $df = 8$ ,  $P < 0.00001$ ,  $RMSEA = 0.094$ . The factor loadings on agency were 0.94 for morality, 0.88 for self-control, and 0.71 for memory. The factor loadings on experience were 0.91 for pleasure, 0.96 for fear, and 0.94 for hunger.

1. Gray HM, Gray K, Wegner DM (2007) Dimensions of mind perception. *Science* 315:619.

**Table S1. Correlations between mind perception and psychopathology**

| Target                                                                                         | Dimension of mind perception |                      |                    | Psychopathy          |
|------------------------------------------------------------------------------------------------|------------------------------|----------------------|--------------------|----------------------|
|                                                                                                |                              | Autism               | Schizotypy         |                      |
|  Adult Humans | Agency                       | <b>-0.14 (-0.13)</b> | -0.07 (-0.07)      | <b>-0.22 (-0.21)</b> |
|                                                                                                | Experience                   | -0.03 (-0.02)        | 0.01 (0.00)        | <b>-0.12 (-0.09)</b> |
|  Baby         | Agency                       | -0.01 (-0.01)        | -0.08 (-0.08)      | -0.07 (-0.07)        |
|                                                                                                | Experience                   | -0.01 (-0.04)        | -0.01 (-0.01)      | <b>-0.15 (-0.09)</b> |
|  Dead Woman   | Agency                       | 0.00 (0.01)          | <b>0.17 (0.17)</b> | -0.03 (-0.01)        |
|                                                                                                | Experience                   | 0.06 (0.07)          | <b>0.16 (0.16)</b> | -0.01 (-0.01)        |
|  Dog          | Agency                       | 0.02 (0.03)          | <b>0.20 (0.20)</b> | -0.04 (-0.02)        |
|                                                                                                | Experience                   | 0.05 (-0.03)         | 0.00 (-0.01)       | <b>-0.14 (-0.08)</b> |
|  God          | Agency                       | -0.03 (-0.01)        | <b>0.15 (0.15)</b> | -0.08 (-0.03)        |
|                                                                                                | Experience                   | 0.01 (0.02)          | <b>0.11 (0.11)</b> | -0.04 (-0.02)        |
|  Robot        | Agency                       | -0.01 (-0.01)        | <b>0.12 (0.12)</b> | 0.08 (0.08)          |
|                                                                                                | Experience                   | 0.05 (0.04)          | 0.08 (0.08)        | 0.10 (0.09)          |
|  Superman     | Agency                       | -0.01 (-0.02)        | 0.06 (0.06)        | <b>0.13 (0.12)</b>   |
|                                                                                                | Experience                   | 0.00 (-0.01)         | 0.05 (0.06)        | <b>0.13 (0.11)</b>   |
|  Tree         | Agency                       | 0.05 (0.04)          | <b>0.19 (0.19)</b> | 0.06 (0.05)          |
|                                                                                                | Experience                   | 0.05 (0.05)          | <b>0.22 (0.22)</b> | 0.03 (0.04)          |

Correlations between mind perception and psychopathology (all,  $df = 843$ ). First correlation is unadjusted; correlations in parentheses control for gender. Boldface correlations are unadjusted correlations significant at  $P < 0.001$ .
